# Supplementary material
Source: publisher figshare collection journal article supplement (https://acs.figshare.com/ndownloader/files/4855801)
Supplement: Supplementary file 1 [file 4855801]

 59
A1, Etot= -1631.0002031 Hartree, Zero point correction = 0.470934 Hartree
C	-1.039768	1.151234	2.611811
C	-1.895116	0.982447	1.520292
C	-3.238576	1.371019	1.633297
C	-3.704753	1.935697	2.813057
C	-2.841112	2.11096		3.892393
C	-1.512091	1.716005	3.793038
P	-1.276435	0.252198	-0.02998
C	-1.311595	1.56392		-1.302015
C	-0.623398	1.339661	-2.501778
C	-0.642439	2.293448	-3.510885
C	-1.327621	3.491508	-3.322523
C	-1.993372	3.730036	-2.12592
C	-1.99036	2.770436	-1.117284
Ru	0.884316	-0.802895	0.169687
C	0.083669	-2.794004	-0.453611
C	-0.090322	-2.639278	0.952678
C	1.19761		-2.498102	1.547644
C	2.173582	-2.595162	0.509033
C	1.484954	-2.769419	-0.725025
C	2.476387	0.46346		0.082953
C	1.380588	1.145162	0.199459
C	3.916387	0.482214	0.03498
C	4.648973	-0.500897	-0.644539
C	6.033783	-0.43675	-0.687758
C	6.702761	0.596609	-0.035591
C	5.985227	1.578567	0.643322
C	4.599464	1.531488	0.670552
C	-2.593836	-0.916931	-0.531797
C	-3.271827	-1.667066	0.436704
C	-4.190984	-2.638732	0.056614
C	-4.442348	-2.872946	-1.292124
C	-3.779783	-2.124461	-2.25994
C	-2.859336	-1.15106	-1.884766
H	0.923859	2.125423	0.167914
H	-2.510859	2.973453	-0.184196
H	-2.517576	4.669557	-1.971135
H	-1.333578	4.243196	-4.107485
H	-0.111073	2.108088	-4.440832
H	-0.059516	0.415576	-2.636819
H	-3.100292	-1.477088	1.495977
H	-4.717491	-3.208922	0.81772
H	-5.16117	-3.632292	-1.588449
H	-3.984422	-2.292368	-3.314276
H	-2.355619	-0.567219	-2.652768
H	1.936786	-2.84495	-1.706898
H	1.397575	-2.341754	2.600634
H	-1.036434	-2.614628	1.479017
H	3.245658	-2.516026	0.641892
H	-0.707339	-2.908416	-1.186115
H	-3.210536	2.549085	4.816095
H	-4.746509	2.235137	2.892918
H	-3.923079	1.220789	0.799424
H	-0.001351	0.831578	2.534799
H	-0.839945	1.842246	4.637769
H	4.029034	2.299243	1.188669
H	6.508709	2.387496	1.145857
H	7.788382	0.640392	-0.062232
H	6.595286	-1.192824	-1.229898
H	4.119617	-1.294744	-1.167758
 59
A2, Etot = -1630.9978122 Hartree, Zero point correction = 0.471619 Hartree
C	4.590529	1.881632	0.121592
C	3.971693	0.647978	-0.139201
C	4.766907	-0.468119	-0.431509
C	6.148719	-0.354358	-0.46695
C	6.752605	0.869607	-0.1888
C	5.973109	1.985243	0.108071
C	2.532439	0.584693	-0.110859
C	1.416135	1.234359	-0.204563
Ru	0.971081	-0.665886	0.256532
C	0.4173		-2.788681	-0.150727
C	1.842424	-2.670392	-0.167082
C	2.267511	-2.25064	1.123418
C	1.10352		-2.103192	1.943613
C	-0.029511	-2.461501	1.159981
P	-1.28782	0.194602	-0.076121
C	-2.153536	-1.04106	-1.106784
C	-3.216694	-1.809108	-0.628341
C	-3.768345	-2.812837	-1.421997
C	-3.270122	-3.051313	-2.697037
C	-2.207715	-2.289469	-3.181754
C	-1.64367	-1.29951	-2.388045
C	-1.597034	1.810912	-0.879797
C	-1.332743	2.966122	-0.129161
C	-1.547825	4.224118	-0.676539
C	-2.034246	4.344311	-1.976151
C	-2.310592	3.203634	-2.720125
C	-2.093578	1.939544	-2.178082
C	-2.238718	0.383695	1.470119
C	-1.609906	0.264779	2.710666
C	-2.327948	0.474109	3.884751
C	-3.677125	0.802128	3.82282
C	-4.308888	0.93841		2.587748
C	-3.59312	0.741844	1.414835
H	-0.785512	-0.736147	-2.756478
H	-1.811853	-2.474452	-4.177177
H	-3.704973	-3.832597	-3.314829
H	-4.593398	-3.407495	-1.038509
H	-3.619491	-1.631005	0.367001
H	-4.083872	0.874085	0.451045
H	-5.360291	1.209605	2.540234
H	-4.238777	0.964573	4.739168
H	-1.831288	0.386074	4.847639
H	-0.54667	0.030175	2.750126
H	3.28608		-2.043867	1.429738
H	-1.059525	-2.451024	1.497627
H	-0.209717	-3.079625	-0.985358
H	1.093251	-1.794916	2.981837
H	2.473097	-2.847535	-1.030095
H	6.446114	2.940361	0.320051
H	4.290307	-1.418344	-0.660448
H	6.758354	-1.220061	-0.711374
H	-2.204478	5.32864		-2.404457
H	-1.3422		5.112326	-0.084682
H	-0.971734	2.87903		0.896424
H	-2.336256	1.059237	-2.767969
H	-2.705889	3.29287		-3.728723
H	7.835869	0.955546	-0.208228
H	3.971992	2.748552	0.342882
H	0.911149	2.154323	-0.465671
 59
A3, Etot = -1630.9960454 Hartree, Zero point correction = 0.471483 Hartre
C	2.312705	2.494048	1.623235
C	2.104908	3.543193	0.667867
C	2.43996		3.038801	-0.616291
C	2.863825	1.68102		-0.464412
C	2.81574		1.360841	0.924436
Ru	0.749791	1.833172	0.220688
C	-0.777587	3.094891	0.055905
C	-1.32627	1.94898		0.297404
C	-2.59307	1.253038	0.364754
C	-2.8948		0.358063	1.397688
C	-4.147078	-0.239841	1.458193
C	-5.097849	0.028432	0.478254
C	-4.804015	0.915715	-0.555427
C	-3.564686	1.534982	-0.607865
P	0.381864	-0.545587	-0.111457
C	1.863456	-1.339061	-0.857275
C	2.867696	-1.858314	-0.031165
C	4.052675	-2.338502	-0.578929
C	4.248797	-2.308372	-1.955773
C	3.24897		-1.808762	-2.785028
C	2.063149	-1.326353	-2.241581
C	0.149776	-1.502628	1.421996
C	0.089844	-2.90278	1.399608
C	-0.020738	-3.615894	2.586846
C	-0.054829	-2.942646	3.80618
C	0.02947		-1.555006	3.839211
C	0.135003	-0.83792	2.651423
C	-0.967908	-0.921804	-1.282888
C	-1.907026	-1.931623	-1.066144
C	-2.89522	-2.179851	-2.014072
C	-2.950463	-1.430853	-3.183967
C	-2.024899	-0.414123	-3.401939
C	-1.047363	-0.15147	-2.450478
H	-1.89064	-2.515121	-0.148894
H	-3.628404	-2.961366	-1.831514
H	-3.721372	-1.631562	-3.92351
H	-2.071438	0.184367	-4.308271
H	-0.350153	0.673221	-2.60589
H	2.720156	-1.90579	1.047231
H	4.821352	-2.743757	0.074209
H	5.175203	-2.683619	-2.382689
H	3.387833	-1.800069	-3.863114
H	1.289466	-0.949239	-2.906536
H	2.358368	3.573607	-1.554473
H	2.132411	2.556857	2.689813
H	3.075132	0.407599	1.368658
H	1.736482	4.536579	0.891334
H	3.186031	1.019011	-1.260412
H	-6.074438	-0.446903	0.52412
H	-4.38068	-0.918728	2.274244
H	-2.151552	0.150315	2.163167
H	-3.3267		2.231871	-1.409317
H	-5.546876	1.12887		-1.319719
H	-0.135763	-3.504227	4.733338
H	-0.070045	-4.701267	2.561186
H	0.154524	-3.438438	0.45336
H	0.204989	0.250954	2.671209
H	0.017048	-1.029314	4.790549
H	-0.902718	4.163184	-0.045101
 59
A4, Etot = -1630.9658987 Hartree, Zero point correction = 0.469707 Hartree
C	1.200747	1.964489	-1.933446
C	1.387406	1.770507	-0.555486
C	1.59596		2.884127	0.262965
C	1.635814	4.162888	-0.28717
C	1.473653	4.343138	-1.656137
C	1.25902		3.240225	-2.480737
P	1.131455	0.090465	0.117338
Ru	-1.101253	-0.524939	-0.487251
C	-1.738646	1.325621	0.743848
C	-2.102155	1.986406	-0.454179
C	-3.407107	1.881627	-0.938865
C	-4.350083	1.089616	-0.289063
C	-3.970056	0.313219	0.809374
C	-2.649974	0.415636	1.31411
C	-4.887007	-0.586988	1.418057
C	-5.658394	-1.367494	1.927171
C	2.443582	-0.977913	-0.578215
C	2.564345	-2.262314	-0.031778
C	3.494415	-3.158041	-0.540698
C	4.314739	-2.780723	-1.602193
C	4.210644	-1.502801	-2.138172
C	3.279999	-0.59909	-1.629488
C	1.582318	0.145078	1.883669
C	0.699083	-0.372386	2.832768
C	1.048623	-0.397694	4.179971
C	2.286177	0.092064	4.58085
C	3.183231	0.589856	3.637039
C	2.839408	0.609047	2.291941
C	-0.432417	-1.969819	-1.961693
C	-1.5331		-1.222691	-2.491846
C	-2.698355	-1.500367	-1.706315
C	-2.300219	-2.352658	-0.648064
C	-0.898402	-2.652752	-0.796987
H	-1.394757	2.668467	-0.922202
H	3.550179	0.980812	1.554109
H	4.15698		0.956012	3.951962
H	2.560943	0.076217	5.632378
H	0.357264	-0.803715	4.913943
H	-0.25627	-0.781214	2.501668
H	3.220511	0.40288		-2.048895
H	4.861038	-1.19988	-2.954864
H	5.04152		-3.482105	-2.00369
H	3.585756	-4.150192	-0.10581
H	1.937451	-2.555888	0.811457
H	-2.937312	-2.694562	0.160784
H	-1.492675	-0.56456	-3.352697
H	0.578983	-1.991408	-2.353401
H	-3.68579	-1.081546	-1.854006
H	-0.313884	-3.30805	-0.162916
H	1.512472	5.341954	-2.082892
H	1.799535	5.020474	0.360261
H	1.727986	2.758236	1.335703
H	1.002316	1.109882	-2.581919
H	1.129479	3.375915	-3.55155
H	-3.698316	2.455262	-1.815327
H	-5.37551	1.039962	-0.645752
H	-2.414897	-0.090167	2.248194
H	-0.857671	1.641796	1.297722
H	-6.351496	-2.043089	2.37934
 59
B1, Etot = -1630.9751245 Hartree, Zero point correction = 0.470034 Hartree
C	1.258885	-3.078564	0.219266
C	0.173509	-3.497054	1.021781
C	-1.007622	-3.559701	0.214117
C	-0.653043	-3.135845	-1.095748
C	0.753868	-2.814188	-1.08685
Ru	-0.340081	-1.414849	0.201657
C	-1.736804	-0.245232	0.013528
C	-2.706706	0.668858	0.056099
C	-4.13624	0.437485	0.013464
C	-4.658233	-0.856079	-0.158247
C	-6.026329	-1.053709	-0.204836
C	-6.893366	0.033622	-0.081024
C	-6.386876	1.319086	0.089529
C	-5.015579	1.523037	0.136651
P	1.210723	0.394386	-0.007771
C	1.257033	1.222889	-1.626264
C	2.339983	2.04555		-1.968535
C	2.357397	2.699732	-3.193526
C	1.30315		2.531937	-4.089065
C	0.231664	1.709576	-3.759978
C	0.207159	1.054304	-2.53253
C	0.876671	1.670349	1.252651
C	1.081001	3.033409	1.025747
C	0.816365	3.95243		2.036741
C	0.352711	3.519617	3.274771
C	0.142065	2.162699	3.506369
C	0.395194	1.242958	2.496312
C	2.924833	-0.164039	0.284871
C	3.667633	-0.714887	-0.766294
C	4.916309	-1.275138	-0.520485
C	5.430603	-1.293593	0.773252
C	4.698751	-0.741112	1.819924
C	3.448976	-0.179225	1.580043
H	2.884961	0.253499	2.40458
H	5.103744	-0.742215	2.82866
H	6.406688	-1.732352	0.963391
H	5.49091		-1.694368	-1.342535
H	3.278324	-0.692903	-1.783666
H	3.174866	2.163273	-1.27853
H	3.199082	3.336216	-3.453927
H	1.322865	3.040505	-5.049596
H	-0.585715	1.571573	-4.463029
H	-0.627463	0.404811	-2.273454
H	-1.988052	-3.873463	0.549111
H	1.324224	-2.471704	-1.942706
H	2.27562		-2.91211	0.555849
H	-1.308391	-3.074962	-1.955914
H	0.21693		-3.706441	2.0841
H	-6.427461	-2.054914	-0.338074
H	-4.612252	2.525389	0.26925
H	-7.063962	2.163451	0.18514
H	0.15036		4.242323	4.061073
H	0.974061	5.012364	1.854357
H	1.438293	3.382754	0.059261
H	0.218125	0.179011	2.670933
H	-0.225998	1.821738	4.470572
H	-7.967995	-0.12453	-0.118136
H	-3.972993	-1.697825	-0.253946
H	-2.353833	1.703422	0.150498
 59
B2, Etot = -1630.9753072 Hartree, Zero point correction = 0.470026 Hartree
C	-0.75636	-0.023823	2.729319
C	-1.731903	-0.035941	1.722062
C	-3.017129	-0.496859	2.01658
C	-3.325367	-0.929031	3.304565
C	-2.359188	-0.898682	4.302952
C	-1.073905	-0.441089	4.015002
P	-1.226478	0.369981	0.018992
C	-2.749161	0.498369	-0.972685
C	-3.729008	1.435617	-0.61888
C	-4.881985	1.553798	-1.382651
C	-5.058328	0.754007	-2.510767
C	-4.079888	-0.162155	-2.878873
C	-2.926542	-0.289967	-2.110205
Ru	0.330611	-1.344189	-0.619851
C	-1.272719	-2.986108	-0.433175
C	-0.531939	-3.241996	-1.598228
C	0.849231	-3.43664	-1.230606
C	0.946003	-3.29853	0.174901
C	-0.35919	-2.951333	0.674411
C	1.713176	-0.191274	-0.295757
C	2.668851	0.730484	-0.170715
C	4.100182	0.510699	-0.141751
C	4.642393	-0.778291	-0.282313
C	6.012358	-0.964755	-0.246606
C	6.861466	0.129354	-0.069574
C	6.335115	1.41062		0.069396
C	4.961944	1.603785	0.030998
C	-0.6019		2.086899	0.03217
C	-0.142262	2.598818	-1.187657
C	0.361464	3.890599	-1.258725
C	0.41618		4.679034	-0.110201
C	-0.047584	4.178053	1.100666
C	-0.562862	2.885646	1.175365
H	-3.781655	-0.521607	1.242271
H	-4.327467	-1.287538	3.525377
H	-2.603878	-1.233409	5.307646
H	-0.315677	-0.417283	4.793559
H	0.258732	0.301259	2.500517
H	-0.176362	1.980213	-2.0857
H	0.712392	4.28363		-2.209522
H	0.814022	5.689205	-0.163972
H	-0.016645	4.795965	1.994466
H	-0.934268	2.506078	2.12509
H	1.844702	-3.387073	0.772694
H	-2.333263	-2.767589	-0.382421
H	-0.917955	-3.27032	-2.610408
H	-0.621815	-2.770687	1.711647
H	1.656468	-3.669637	-1.913761
H	2.299703	1.762021	-0.101462
H	7.937701	-0.019657	-0.043319
H	6.998345	2.260512	0.204916
H	4.542572	2.602729	0.137261
H	3.971663	-1.624157	-0.430701
H	6.429033	-1.962045	-0.359998
H	-5.960822	0.852984	-3.10834
H	-5.644177	2.276133	-1.10242
H	-3.588353	2.070582	0.255502
H	-2.148004	-0.996042	-2.398074
H	-4.211567	-0.775509	-3.766389
 59
B3, Etot = -1630.9774008 Hartree, Zero point correction = 0.470632 Hartree
C	-3.390482	-0.187916	-0.071757
C	-3.602926	1.189749	0.105418
C	-4.917949	1.675559	0.182173
C	-5.993526	0.805353	0.090944
C	-5.770893	-0.558045	-0.085699
C	-4.468109	-1.050632	-0.168411
C	-2.506717	2.131844	0.205906
C	-1.188605	1.926831	0.188628
Ru	0.641053	1.841903	-0.016667
P	0.769978	-0.55446	-0.012441
C	-0.243948	-1.254902	-1.359618
C	-0.490966	-0.454634	-2.48027
C	-1.297434	-0.92016	-3.512129
C	-1.869046	-2.186399	-3.425303
C	-1.625514	-2.98911	-2.314417
C	-0.814403	-2.528719	-1.282303
C	2.894908	2.198788	-0.244407
C	2.190599	3.277213	-0.846759
C	1.413101	3.938556	0.151539
C	1.587023	3.223768	1.371653
C	2.512142	2.144868	1.119855
C	2.477053	-1.116702	-0.324228
C	2.924034	-1.311776	-1.634056
C	4.264623	-1.592875	-1.877629
C	5.165765	-1.678631	-0.820331
C	4.724132	-1.491986	0.48696
C	3.38607		-1.209624	0.73615
C	0.25124		-1.396702	1.515761
C	0.66903		-2.707358	1.787459
C	0.214622	-3.361381	2.925433
C	-0.656152	-2.716222	3.800676
C	-1.071431	-1.415042	3.539014
C	-0.617551	-0.754132	2.402235
H	1.356307	-3.214131	1.111293
H	0.543356	-4.376619	3.132029
H	-1.006676	-3.229495	4.69249
H	-1.746349	-0.909147	4.224429
H	-0.934936	0.268073	2.197936
H	-0.053735	0.545323	-2.536688
H	-1.488424	-0.292052	-4.37818
H	-2.509389	-2.547884	-4.225805
H	-2.071396	-3.978496	-2.248297
H	-0.645183	-3.153455	-0.407551
H	0.788168	4.808297	-0.00292
H	2.856346	1.427448	1.855577
H	3.548765	1.49911		-0.751902
H	1.138866	3.459724	2.328719
H	2.221834	3.54322		-1.89684
H	-2.77563	3.191185	0.296809
H	-6.614436	-1.239413	-0.160571
H	-7.007853	1.189633	0.154695
H	-5.086596	2.742699	0.315977
H	-2.377783	-0.578426	-0.144747
H	-4.292573	-2.114149	-0.310549
H	6.212324	-1.898514	-1.014581
H	4.605088	-1.750931	-2.89779
H	2.22467		-1.247208	-2.466524
H	3.043909	-1.077543	1.762453
H	5.423179	-1.571537	1.315601
 59
C1, Etot = - 1630.9410656 Hartree, Zero point correction = 0.467093 Hartree
C	-0.728209	-2.752301	-0.356557
C	-0.296002	-1.543977	-0.91409
C	-0.728756	-1.185029	-2.19447
C	-1.578349	-2.022038	-2.908125
C	-2.008859	-3.221021	-2.346067
C	-1.583076	-3.58523	-1.072285
P	0.885152	-0.491335	-0.005958
Ru	0.617089	1.816816	-0.225882
C	-1.276621	1.520625	-0.233024
C	-2.490011	1.22316		-0.20492
C	-3.814162	0.769503	-0.129482
C	-4.068881	-0.621557	-0.108515
C	-5.370208	-1.083509	-0.038686
C	-6.428959	-0.17386	0.004498
C	-6.192392	1.202216	-0.015763
C	-4.895122	1.676497	-0.077891
C	0.692731	-0.981641	1.743589
C	-0.405262	-0.493651	2.463992
C	-0.614818	-0.898128	3.776929
C	0.267044	-1.788365	4.382984
C	1.353754	-2.284203	3.670016
C	1.569091	-1.886189	2.354705
C	2.537968	-1.068481	-0.514058
C	2.707016	-1.893499	-1.62734
C	3.986227	-2.273791	-2.025977
C	5.098599	-1.84249	-1.31394
C	4.936844	-1.023843	-0.196829
C	3.664687	-0.63308	0.197542
C	2.269796	2.851588	0.898974
C	2.787414	2.560445	-0.385058
C	1.981306	3.253576	-1.330725
C	1.025181	4.064949	-0.627664
C	1.192203	3.808358	0.741656
H	2.413556	-2.292283	1.80278
H	2.03737		-2.989305	4.135877
H	0.104643	-2.099128	5.411881
H	-1.469414	-0.515175	4.32877
H	-1.102093	0.19701		1.99143
H	-0.406136	-0.242666	-2.634433
H	-1.909659	-1.734163	-3.902413
H	-2.676097	-3.873106	-2.904048
H	-1.912885	-4.523473	-0.633291
H	-0.397462	-3.046161	0.637954
H	0.28635		4.714		-1.079286
H	2.648531	2.477591	1.843649
H	3.598007	1.880404	-0.616886
H	0.597029	4.227887	1.544434
H	2.102605	3.220659	-2.406749
H	-7.450898	-0.541564	0.055638
H	-7.026775	1.897011	0.018971
H	-4.686217	2.743056	-0.093154
H	-3.223724	-1.308792	-0.141595
H	-5.57027	-2.15133	-0.019786
H	6.09505		-2.145905	-1.624304
H	4.109135	-2.916553	-2.893679
H	1.840913	-2.245544	-2.184212
H	3.542022	-0.000145	1.07688
H	5.804783	-0.694674	0.369031
H	0.681365	1.34224		-1.735781
